# Supplementary material for: Alginate Films Enriched in Raspberry and/or Black Currant Seed Oils as Active Food Packaging
Source: MDPI journal article supplement (doi:10.3390/molecules29092012), 2024-04-27
Supplement: s1 [file s1]

# Supplementary Materials

| Agar medium with the studied films                                                  |  | Agar medium after removing the films                                                 |  |
|-------------------------------------------------------------------------------------|--|--------------------------------------------------------------------------------------|--|
|    |  |    |  |
| Alg+G+RSO (50%) film on agar with <i>Bacillus subtilis</i>                          |  | After removing Alg+G+RSO (50%) film from agar with <i>Bacillus subtilis</i>          |  |
|   |  |   |  |
| Alg+G+BCSO (50%) film on agar with <i>Bacillus subtilis</i>                         |  | After removing Alg+G+BCSO (50%) film from agar with <i>Bacillus subtilis</i>         |  |
|  |  |  |  |
| Alg+G+RSO (50%) film on agar with <i>Pseudomonas aeruginosa</i>                     |  | After removing Alg+G+RSO (50%) film from agar with <i>Pseudomonas aeruginosa</i>     |  |
|  |  |  |  |
| Alg+G+BCSO (50%) film on agar with <i>Pseudomonas aeruginosa</i>                    |  | After removing Alg+G+BCSO (50%) film from agar with <i>Pseudomonas aeruginosa</i>    |  |
|  |  |  |  |

|                                                                                   |                                                                                 |                                                                                    |  |
|-----------------------------------------------------------------------------------|---------------------------------------------------------------------------------|------------------------------------------------------------------------------------|--|
|  |                                                                                 |  |  |
| Alg+G+RSO (50%) film on agar with <i>Staphylococcus aureus</i>                    | After removing Alg+G+RSO (50%) film from agar with <i>Staphylococcus aureus</i> |                                                                                    |  |

Figure. S1. Growth of bacteria on agar medium with the studied films (left side) and after removing the films (right side).
